# Supplementary material
Source: Springer Nature journal article supplement (https://www.springermedizin.de/resource/supplementary/12967_2014_1885_MOESM1_ESM.pdf/9575044)
Supplement: MOESM1 [file 9575044]

Table 1. Probability (95% CI) of no metastasis as a function of time.

A. The two sample subsets defined in Figure 1, middle ( $p=0.048$ ).

| Time (years)  | 2                | 3                | 5                | 10               |
|---------------|------------------|------------------|------------------|------------------|
| Group A n=139 | 0.79 (0.70-0.85) | 0.69 (0.60-0.77) | 0.60 (0.50-0.69) | 0.49 (0.34-0.62) |
| Group B n=170 | 0.63 (0.55-0.70) | 0.55 (0.46-0.63) | 0.53 (0.44-0.61) | 0.47 (0.37-0.57) |

B. The four sample subsets defined in Figure 1, bottom ( $p<0.0001$ ).

| Time (years)  | 2                | 3                | 5                | 10               |
|---------------|------------------|------------------|------------------|------------------|
| Group 1 n=35  | 0.50 (0.32-0.65) | 0.30 (0.15-0.46) | 0.15 (0.05-0.30) | 0.07 (0.01-0.25) |
| Group 2 n=104 | 0.90 (0.82-0.94) | 0.83 (0.73-0.90) | 0.77 (0.65-0.85) | 0.64 (0.43-0.79) |
| Group 3 n=62  | 0.52 (0.39-0.65) | 0.40 (0.26-0.54) | 0.40 (0.26-0.54) | 0.40 (0.26-0.54) |
| Group 4 n=108 | 0.70 (0.59-0.78) | 0.64 (0.53-0.73) | 0.61 (0.49-0.70) | 0.53 (0.40-0.65) |

C. The four sample subsets defined by histology shown in Figure 2 ( $p=0.0004$ ).

| Time (years) | 2                | 3                | 5                | 10               |
|--------------|------------------|------------------|------------------|------------------|
| LMS n=84     | 0.56 (0.44-0.66) | 0.42 (0.30-0.53) | 0.33 (0.22-0.45) | 0.25 (0.13-0.39) |
| LipoD n=62   | 0.84 (0.71-0.91) | 0.71 (0.56-0.82) | 0.71 (0.56-0.82) | 0.56 (0.32-0.75) |
| Other n=27   | 0.73 (0.50-0.87) | 0.73 (0.50-0.87) | 0.62 (0.38-0.79) | 0.62 (0.38-0.79) |
| UPS n=136    | 0.73 (0.64-0.80) | 0.68 (0.58-0.75) | 0.64 (0.54-0.72) | 0.57 (0.45-0.68) |

D. The two LipoD sample subsets defined in Figure 3, top ( $p=0.0128$ ).

| Time (years) | 2                | 3                | 5                | 10               |
|--------------|------------------|------------------|------------------|------------------|
| Group A n=18 | 1.00 (NA)        | 0.93 (0.61-0.99) | 0.93 (0.61-0.99) | 0.93 (0.61-0.99) |
| Group B n=44 | 0.76 (0.59-0.87) | 0.60 (0.40-0.75) | 0.60 (0.40-0.75) | 0.34 (0.08-0.63) |

E. The two UPS sample subsets defined in Figure 3, middle ( $p=0.0002$ ).

| Time (years) | 2                | 3                | 5                | 10               |
|--------------|------------------|------------------|------------------|------------------|
| Group A n=49 | 0.94 (0.82-0.98) | 0.91 (0.78-0.97) | 0.84 (0.67-0.93) | 0.74 (0.44-0.89) |
| Group B n=87 | 0.60 (0.48-0.70) | 0.53 (0.41-0.64) | 0.51 (0.38-0.62) | 0.47 (0.33-0.59) |

F. The four UPS sample subsets defined in Figure 3, bottom ( $p=0.0007$ ).

| Time (years) | 2                | 3                | 5                | 10               |
|--------------|------------------|------------------|------------------|------------------|
| Group 1 n=23 | 1.00 (NA)        | 0.95 (0.68-0.99) | 0.80 (0.48-0.93) | 0.80 (0.48-0.93) |
| Group 2 n=26 | 0.88 (0.68-0.96) | 0.88 (0.68-0.96) | 0.88 (0.68-0.96) | 0.76 (0.40-0.92) |
| Group 3 n=43 | 0.52 (0.35-0.67) | 0.44 (0.27-0.60) | 0.44 (0.27-0.60) | 0.38 (0.20-0.56) |
| Group 4 n=44 | 0.67 (0.50-0.79) | 0.61 (0.43-0.74) | 0.57 (0.39-0.71) | 0.57 (0.39-0.71) |

G. The two UPS sample subsets defined in Figure 4, top row with the RCC-gene set ( $p=0.0002$ ).

| Time (years) | 2                | 3                | 5                | 10               |
|--------------|------------------|------------------|------------------|------------------|
| Group A      | 0.92 (0.81-0.97) | 0.85 (0.72-0.92) | 0.80 (0.65-0.89) | 0.71 (0.47-0.86) |
| Group B      | 0.56 (0.43-0.67) | 0.52 (0.39-0.64) | 0.50 (0.37-0.62) | 0.45 (0.31-0.59) |

H. The four UPS sample subsets defined in Figure 4, top row with the RCC-gene set ( $p < 0.0007$ ).

| Time (years) | 2                | 3                | 5                | 10               |
|--------------|------------------|------------------|------------------|------------------|
| Group 1 n=29 | 0.90 (0.70-0.96) | 0.77 (0.52-0.90) | 0.69 (0.40-0.86) | 0.69 (0.40-0.86) |
| Group 2 n=35 | 0.94 (0.78-0.98) | 0.91 (0.74-0.97) | 0.86 (0.67-0.95) | 0.74 (0.40-0.91) |
| Group 3 n=32 | 0.66 (0.46-0.80) | 0.61 (0.40-0.76) | 0.54 (0.32-0.72) | 0.54 (0.32-0.72) |
| Group 4 n=40 | 0.49 (0.32-0.64) | 0.46 (0.29-0.61) | 0.46 (0.29-0.61) | 0.39 (0.21-0.56) |

I. The two UPS sample subsets defined in Figure 4, second row with the AF-gene set ( $p = 0.0007$ ).

| Time (years) | 2                | 3                | 5                | 10               |
|--------------|------------------|------------------|------------------|------------------|
| Group A n=51 | 0.94 (0.82-0.98) | 0.86 (0.72-0.94) | 0.80 (0.63-0.90) | 0.70 (0.43-0.86) |
| Group B n=85 | 0.59 (0.47-0.70) | 0.56 (0.44-0.67) | 0.54 (0.41-0.65) | 0.49 (0.35-0.62) |

J. The four UPS sample subsets defined in Figure 4, second row with the AF-gene set ( $p = 0.008$ ).

| Time (years) | 2                | 3                | 5                | 10               |
|--------------|------------------|------------------|------------------|------------------|
| Group 1 n=22 | 0.95 (0.72-0.99) | 0.89 (0.62-0.97) | 0.80 (0.48-0.94) | 0.80 (0.48-0.94) |
| Group 2 n=29 | 0.93 (0.75-0.98) | 0.85 (0.64-0.94) | 0.80 (0.58-0.91) | 0.67 (0.33-0.86) |
| Group 3 n=42 | 0.59 (0.41-0.73) | 0.55 (0.36-0.70) | 0.55 (0.36-0.70) | 0.44 (0.20-0.65) |
| Group 4 n=43 | 0.60 (0.43-0.73) | 0.57 (0.40-0.71) | 0.53 (0.36-0.68) | 0.53 (0.36-0.68) |

K. The two UPS sample subsets defined in Figure 4, third row with the OVCA-gene set ( $p = 0.004$ ).

| Time (years) | 2                | 3                | 5                | 10               |
|--------------|------------------|------------------|------------------|------------------|
| Group A n=44 | 0.92 (0.78-0.98) | 0.86 (0.70-0.94) | 0.75 (0.55-0.87) | 0.75 (0.55-0.87) |
| Group B n=92 | 0.63 (0.52-0.73) | 0.59 (0.47-0.69) | 0.59 (0.47-0.69) | 0.50 (0.34-0.63) |

L. The five UPS sample subsets defined in Figure 4, third row with the OVCA-gene set ( $p = 0.0009$ ).

| Time (years) | 2                | 3                | 5                | 10               |
|--------------|------------------|------------------|------------------|------------------|
| Group 1 n=23 | 0.87 (0.64-0.95) | 0.76 (0.51-0.89) | 0.60 (0.32-0.80) | 0.60 (0.32-0.80) |
| Group 2 n=21 | 1.00 (NA)        | 1.00 (NA)        | 0.92 (0.54-0.99) | 0.92 (0.54-0.99) |
| Group 3 n=25 | 0.37 (0.17-0.58) | 0.32 (0.13-0.52) | 0.32 (0.13-0.52) | 0.16 (0.01-0.45) |
| Group 4 n=28 | 0.66 (0.45-0.81) | 0.61 (0.40-0.77) | 0.61 (0.40-0.77) | 0.61 (0.40-0.77) |
| Group 5 n=39 | 0.76 (0.59-0.87) | 0.72 (0.54-0.84) | 0.72 (0.54-0.84) | 0.60 (0.32-0.80) |

M. The four LipoD sample subsets defined in Figure 4, bottom row with the AF-gene set ( $p = 0.011$ ).

| Time (years) | 2                | 3                | 5                | 10                |
|--------------|------------------|------------------|------------------|-------------------|
| Group 1 n=22 | 0.74 (0.44-0.89) | 0.53 (0.22-0.76) | 0.53 (0.22-0.76) | 0.35 (0.07-0.66)  |
| Group 2 n=12 | 1.00 (NA)        | 0.89 (0.43-0.98) | 0.89 (0.43-0.98) | 0.89 (0.43-0.98)  |
| Group 3 n=11 | 1.00 (NA)        | 1.00 (NA)        | 1.00 (NA)        | Insufficient data |
| Group 4 n=17 | 0.70 (0.42-0.86) | 0.51 (0.22-0.74) | 0.51 (0.22-0.74) | Insufficient data |
